# Supplementary material
Source: publisher figshare collection journal article supplement (https://frontiersin.figshare.com/ndownloader/files/11276477)

**Supplementary Fig.1.** (A) Cell proliferation time kinetics of 2D static vs 3D dynamic JIMT-1 cells treated with 50nM each of triple combination of drugs (PAC, DAS and EVE). Primary Y-axis represents 3DD cell counts per million cells and secondary Y-axis represents cell counts per thousand cells. (B) Percent cell viability of JIMT-1 cells treated with single agents, double combination and triple combination for 96 hours. \*\* indicates a p-value of <0.001 compared to control and ## indicates a p-value of <0.001 compared to paclitaxel. (C) phosphor-mTOR protein expression in control and 50nM everolimus treated JIMT-1 cells for 9 hours in static condition. \*\* indicates a p-value of <0.001 compared to control. (C) phosphor-Src protein expression in control and 50nM dasatinib treated JIMT-1 cells for 9 hours in static condition. \*\* indicates a p-value of <0.001 compared to control.

Suppl. Fig. 1

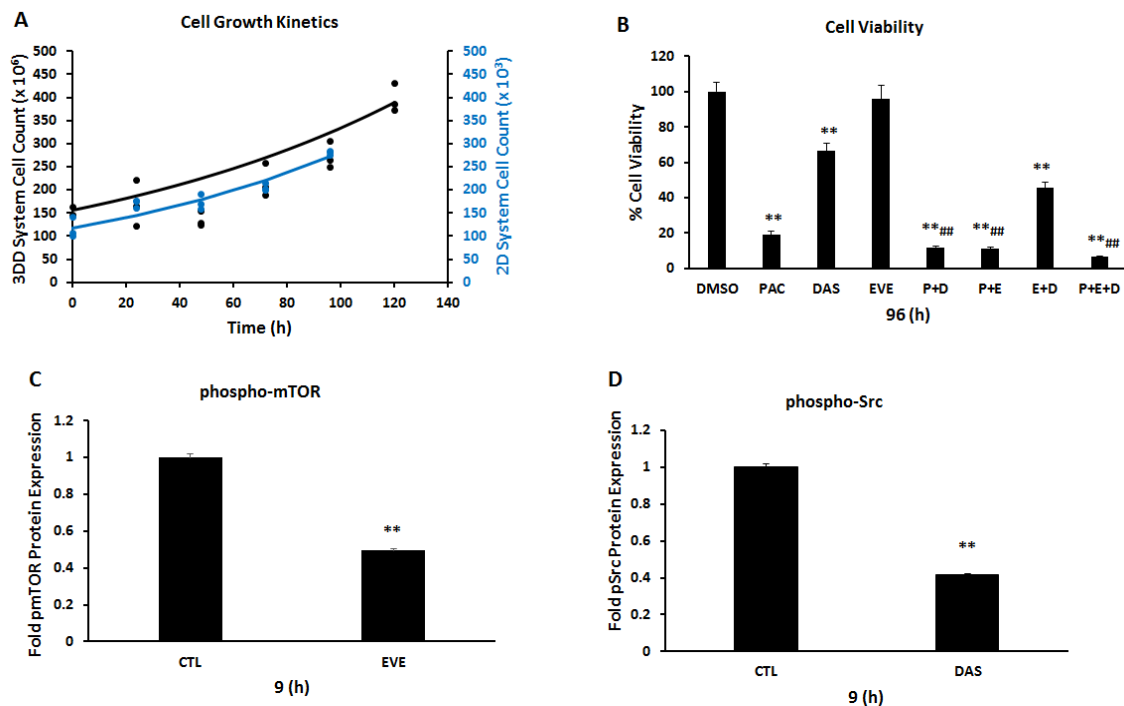

Supplement: Supplementary file [file 11276477]
